# Supplementary material for: Curing and Molecular Dynamics Simulation of MXene/Phenolic Epoxy Composites with Different Amine Curing Agent Systems
Source: MDPI journal article supplement (doi:10.3390/nano12132249), 2022-06-30
Supplement: s1 [file s1]

Supporting Information for

# Curing and molecular dynamics simulation of MXene/ phenolic epoxy composites with different amine curing agent systems

**Rui Cai <sup>1,2,\*</sup>, Jinlong Zhao <sup>3</sup>, Naixin Lv <sup>1</sup>, Anqing Fu <sup>1</sup>, Chengxian Yin <sup>1</sup>, Chengjun Song <sup>4</sup> and Min Chao <sup>4,\*</sup>**

<sup>1</sup> State Key Laboratory for Performance and Structure Safety of Petroleum Tubular Goods and Equipment Materials, CNPC Tubular Goods Research Institute, Xi'an 710077, China; lvnx@cnpc.com.cn (N.L.); fuanqing@cnpc.com.cn (A.F.); yincx@cnpc.com.cn (C.Y.)

<sup>2</sup> School of Chemical Engineering and Technology, Xi'an Jiaotong University, Xi'an 710049, China

<sup>3</sup> Petrochina Jidong Oilfield Company, Tangshan 063004, China; yj\_zhaojl@petrochina.com.cn

<sup>4</sup> Polymer Materials & Engineering Department, School of Materials Science & Engineering, Chang'an University, Xi'an 710064, China; spike725@163.com

\* Correspondence: cair@cnpc.com.cn (R.C.); chaomin@chd.edu.cn (M.C.)

## Table of Contents

Figure S1. The illustration of synthesis of few layers  $\text{Ti}_3\text{C}_2\text{T}_x$  MXene.

Figure S2. The characteristic fitting curves of (a) PNE-177/DDS and (b) PNE-177/DICY.

Table S1: The Kinetics parameters of PNE-177/DDS and PNE-177/DICY systems based on non-isothermal DSC analysis.

Table S2: The exothermic peak area and curing degree of MXene/epoxy composite before and after curing at a heating rate of  $5^\circ\text{C}/\text{min}$ .

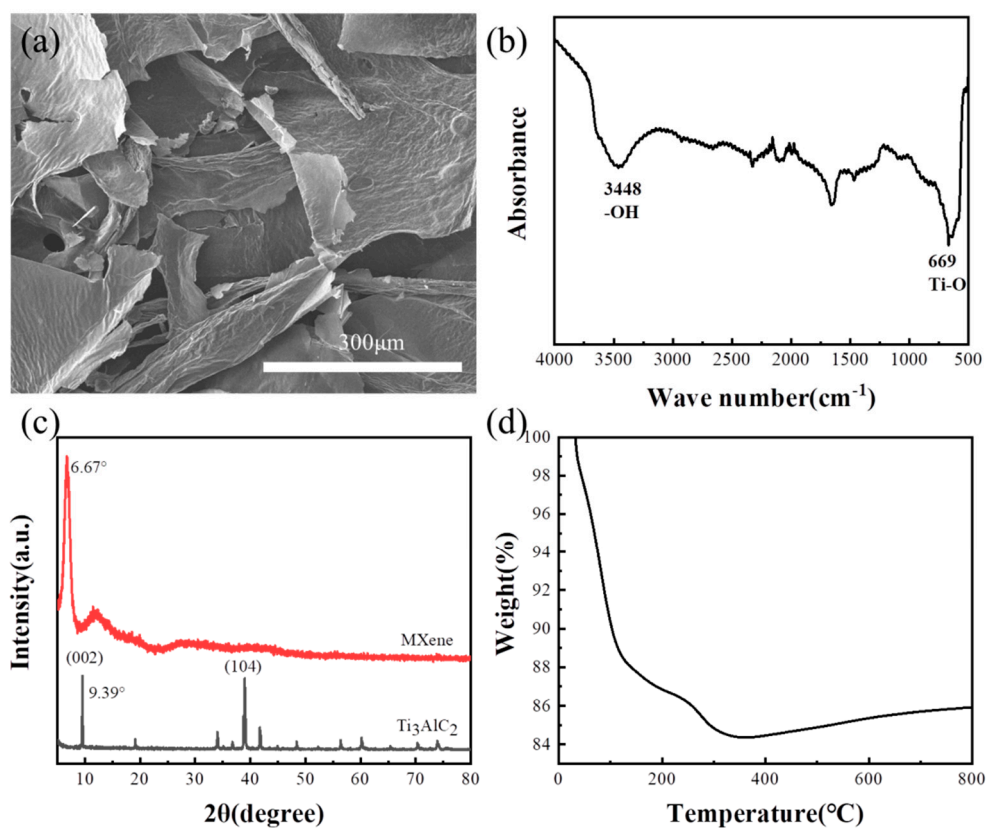

Figure S1 SEM (a), FTIR (b), XRD (c), and TGA (d) performance tests of MXene.

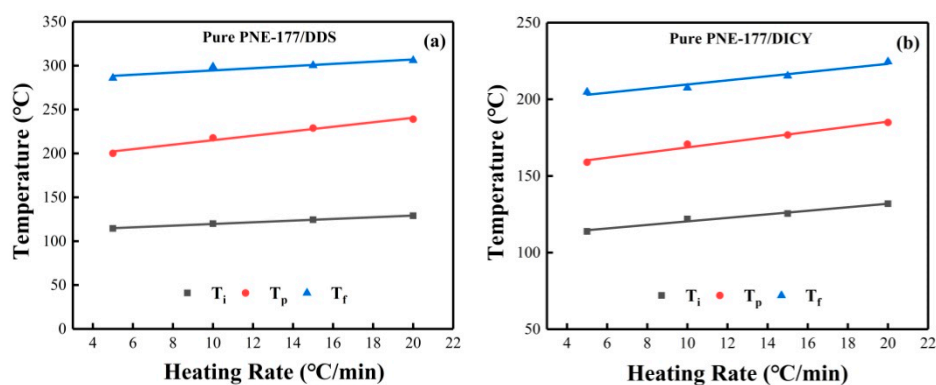

Figure S2. The characteristic fitting curves of (a) PNE-177/DDS and (b) PNE-177/DICY.

Table S1: The Kinetics parameters of PNE-177/DDS and PNE-177/DICY systems based on non-isothermal DSC analysis.

| Epoxy System | MXene (wt%) | $\alpha_p$ | $\alpha_M$ | $\alpha_p^\infty$ | p     | m     | n     | lnA   |
|--------------|-------------|------------|------------|-------------------|-------|-------|-------|-------|
| PNE-177/DDS  | 0           | 0.68       | 0.188      | 0.542             | 0.231 | 0.184 | 0.891 | 10.77 |
|              | 1           | 0.67       | 0.185      | 0.545             | 0.226 | 0.189 | 0.89  | 10.78 |
|              | 3           | 0.66       | 0.184      | 0.54              | 0.225 | 0.191 | 0.887 | 10.74 |
|              | 5           | 0.7        | 0.191      | 0.553             | 0.236 | 0.197 | 0.895 | 10.81 |
| PNE-177/DICY | 0           | 0.48       | 0.315      | 0.58              | 0.459 | 0.553 | 1.441 | 11.09 |
|              | 1           | 0.47       | 0.322      | 0.587             | 0.474 | 0.556 | 1.439 | 11.11 |
|              | 3           | 0.47       | 0.328      | 0.596             | 0.488 | 0.565 | 1.434 | 11.25 |
|              | 5           | 0.46       | 0.331      | 0.599             | 0.494 | 0.57  | 1.446 | 11.29 |

Table S2: The exothermic peak area and curing degree of MXene/epoxy composite before and after curing at a heating rate of 5 °C/min.

| Epoxy System | MXene<br>(wt%) | A <sub>0</sub> | A <sub>1</sub> | Curing<br>degree(%) |
|--------------|----------------|----------------|----------------|---------------------|
| PNE-177/DDS  | 0              | 444.012        | 52.839         | 89.1                |
|              | 1              | 339.993        | 24.138         | 92.9                |
|              | 3              | 360.379        | 23.424         | 93.5                |
|              | 5              | 235.941        | 21.707         | 90.8                |
| PNE-177/DICY | 0              | 795.737        | 116.178        | 85.4                |
|              | 1              | 349.628        | 34.613         | 90.1                |
|              | 3              | 238.043        | 29.279         | 87.7                |
|              | 5              | 351.83         | 37.998         | 89.2                |
